# Supplementary material for: Fibrillarin evolution through the Tree of Life: Comparative genomics and microsynteny network analyses provide new insights into the evolutionary history of Fibrillarin
Source: PLOS journal article supplement (doi:10.1371/journal.pcbi.1008318), 2020-10-19

FC: F-1  
TC: 33  
RN: 3-10  
DC: 10  
AF:  $\geq 6$

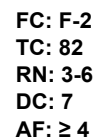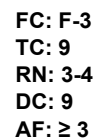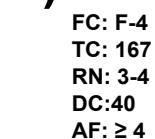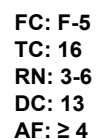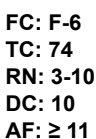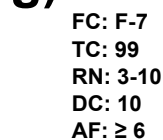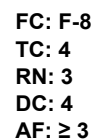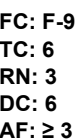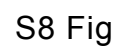

Supplement: S8 (10.1371/journal.pcbi.1008318.s008) [file journal.pcbi.1008318.s008]
